# Supplementary material for: Diagnosing Vitreoretinal Lymphomas—An Analysis of the Sensitivity of Existing Tools
Source: MDPI journal article supplement (doi:10.3390/cancers14030598), 2022-01-25
Supplement: s1 [file s1]

# Diagnosing Vitreoretinal Lymphomas—An Analysis of the Sensitivity of Existing Tools

Anahita Sehgal <sup>1</sup>, Jose S. Pulido <sup>1,2</sup>, Arman Mashayekhi <sup>3</sup>, Tatyana Milman <sup>4</sup> and Gabor Gy Deák <sup>5,\*</sup>

<sup>1</sup> Department of Ophthalmology, Wills Eye Hospital, Sidney Kimmel Medical College, Thomas Jefferson University, Philadelphia, PA 19107, USA; Anahita.Sehgal@students.jefferson.edu (A.S.); jPulido@willseye.org (J.S.P.)

<sup>2</sup> Bower Laboratory for Translational Medicine Vickie and Jack Farber, Vision Research Center at Wills Eye Hospital, Wills Eye Hospital, Philadelphia, PA 19107, USA

<sup>3</sup> Department of Ophthalmology, Mayo Clinic, Jacksonville, FL 32224, USA; arman\_mash@yahoo.com

<sup>4</sup> Department of Pathology, Wills Eye Hospital, Sidney Kimmel Medical College, Thomas Jefferson University, Philadelphia, PA 19107, USA; tmilman@willseye.org

<sup>5</sup> Department of Ophthalmology, Medical University of Vienna, 1090 Vienna, Austria

\* Correspondence: email: gabor.deak@meduniwien.ac.at; Tel.: +43-1-40-4007-9310

**Table S1.** Detailed data of the number of total and positive cytology, *MyD88* and *IgH* Rearrangement samples in the dataset.

| S/N | Study                                                                    | Number of Cytology Samples | Number of Cytology (+) Samples | Number of MyD88 Samples | Number of MyD88 (+) Samples | Number of PCR <i>IgH</i> Rearrangement Samples | Number of PCR <i>IgH</i> (+) Samples |
|-----|--------------------------------------------------------------------------|----------------------------|--------------------------------|-------------------------|-----------------------------|------------------------------------------------|--------------------------------------|
| 1   | Giuffrè (2020); Ocul Immunol and Inflamm                                 | 33                         | 12                             | 23                      | 19                          | NA                                             | NA                                   |
| 2   | Tsubota (2020); J Clin Med                                               | 40                         | 20                             | NA                      | NA                          | NA                                             | NA                                   |
| 3   | Arai (2020); Cancer Sci                                                  | 7                          | 7                              | 7                       | 4                           | NA                                             | NA                                   |
| 4   | Lee (2020); Haematologica                                                | 9                          | 3                              | 9                       | 7                           | 9                                              | 5                                    |
| 5   | Marchese (2019); Br J ophthalmol                                         | 18                         | 13                             | NA                      | NA                          | NA                                             | NA                                   |
| 6   | Shi (2021); Ocul Immunol Inflamm                                         | NA                         | NA                             | 29                      | 22                          | NA                                             | NA                                   |
| 7   | Tan (2019); Blood                                                        | NA                         | NA                             | 3                       | 3                           | NA                                             | NA                                   |
| 8   | Quintyn (2019); Cytopathology                                            | 12                         | 6                              | 8                       | 6                           | 10                                             | 5                                    |
| 9   | Ito (2019); Graefe's Archive for Clinical and Experimental Ophthalmology | 35                         | 27                             | NA                      | NA                          | NA                                             | NA                                   |
| 10  | Hoog (2019); Acta Ophthalmol                                             | NA                         | NA                             | NA                      | NA                          | NA                                             | NA                                   |
| 11  | Yonese (2019); Eur J Haematol                                            | 17                         | 13                             | 17                      | 12                          | NA                                             | NA                                   |
| 12  | Miserocchi (2019); Retina                                                | 12                         | 8                              | 8                       | 8                           | NA                                             | NA                                   |
| 13  | Carreno (2018); Acta Ophthalmol                                          | NA                         | NA                             | 15                      | 11                          | 7                                              | 1                                    |
| 14  | Hiemcke-Jiwa (2018); JAMA Ophthalmol                                     | 20                         | 6                              | 21                      | 16                          | NA                                             | NA                                   |
| 15  | Nakahara (2018); BMC Ophthalmol                                          | NA                         | NA                             | NA                      | NA                          | 5                                              | 4                                    |
| 16  | Lee (2019); Retina                                                       | 22                         | 7                              | NA                      | NA                          | 22                                             | 19                                   |
| 17  | Cho (2018); Ocul Immunol Inflamm                                         | 53                         | 6                              | NA                      | NA                          | NA                                             | NA                                   |

|    |                                          |     |    |    |    |     |     |
|----|------------------------------------------|-----|----|----|----|-----|-----|
| 18 | Pochat-Cotilloux (2018); Retina          | 16  | 15 | NA | NA | NA  | NA  |
| 19 | Cani (2017); Oncotarget                  | 4   | 2  | 4  | 2  | NA  | NA  |
| 20 | Cimino (2016); Indian J Ophthalmol       | 7   | 7  | NA | NA | 7   | 7   |
| 21 | Taki (2017); Ocul Immunol Inflamm        | 6   | 6  | NA | NA | NA  | NA  |
| 22 | Mahajan (2016); Ocul Immunol Inflamm     | 10  | 10 | NA | NA | NA  | NA  |
| 23 | Kase (2016); Diagn Pathol                | 15  | 14 | NA | NA | NA  | NA  |
| 24 | Raja (2016); Retina                      | NA  | NA | 23 | 14 | NA  | NA  |
| 25 | Bonzheim (2015); Blood                   | 26  | 13 | 26 | 16 | 26  | 17  |
| 26 | Pulido (2015); Retina                    | NA  | NA | 3  | 2  | NA  | NA  |
| 27 | Levasseur (2013); JAMA Ophthalmol        | 31  | 27 | NA | NA | 18  | 8   |
| 28 | Wang (2011); Int J Mol Sci               | 123 | 66 | NA | NA | 114 | 114 |
| 29 | Ma (2016); Ann Hematol                   | 19  | 19 | NA | NA | NA  | NA  |
| 30 | Egawa (2015); BMC Ophthalmol             | 3   | 3  | NA | NA | NA  | NA  |
| 31 | Wang (2014); Cancer Sci                  | 28  | 5  | NA | NA | 28  | 28  |
| 32 | Jang (2013); J Ophthalmic Inflamm Infect | 5   | 5  | NA | NA | NA  | NA  |
| 33 | Teckie (2014); Leuk Lymphoma             | 18  | 17 | NA | NA | NA  | NA  |

**Table S2.** Detailed data of the number of total and positive Flow cytometry and IL10/IL6 Ratio samples in the dataset.

| S/N | Study                                                                    | Number of Flow Cytometry Samples | Number of Flow (+) Samples | Number of IL 10/IL 6 Ratio Samples | Number of IL10/IL6 Ratio (+) Samples |
|-----|--------------------------------------------------------------------------|----------------------------------|----------------------------|------------------------------------|--------------------------------------|
| 1   | Giufrrè (2020); Ocul Immunol and Inflamm                                 | NA                               | NA                         | NA                                 | NA                                   |
| 2   | Tsubota (2020); J Clin Med                                               | NA                               | NA                         | 40                                 | 32                                   |
| 3   | Arai (2020); Cancer Sci                                                  | NA                               | NA                         | 7                                  | 7                                    |
| 4   | Lee (2020); Haematologica                                                | NA                               | NA                         | 9                                  | 9                                    |
| 5   | Marchese (2019); Br J ophthalmol                                         | 12                               | 8                          | NA                                 | NA                                   |
| 6   | Shi (2021); Ocul Immunol Inflamm                                         | NA                               | NA                         | NA                                 | NA                                   |
| 7   | Tan (2019); Blood                                                        | NA                               | NA                         | NA                                 | NA                                   |
| 8   | Quintyn (2019); Cytopathology                                            | NA                               | NA                         | 10                                 | 8                                    |
| 9   | Ito (2019); Graefe's Archive for Clinical and Experimental Ophthalmology | NA                               | NA                         | NA                                 | NA                                   |
| 10  | Hoog (2019); Acta Ophthalmol                                             | 10                               | 6                          | 10                                 | 9                                    |
| 11  | Yonese (2019); Eur J Haematol                                            | 17                               | 9                          | 17                                 | 16                                   |
| 12  | Miserocchi (2019); Retina                                                | NA                               | NA                         | NA                                 | NA                                   |
| 13  | Carreno (2018); Acta Ophthalmol                                          | NA                               | NA                         | NA                                 | NA                                   |
| 14  | Hiemcke-Jiwa (2018); JAMA Ophthal                                        | 17                               | 10                         | NA                                 | NA                                   |
| 15  | Nakahara (2018); BMC Ophthalmol                                          | 5                                | 0                          | NA                                 | NA                                   |
| 16  | Lee (2019); Retina                                                       | NA                               | NA                         | 22                                 | 18                                   |
| 17  | Cho (2018); Ocul Immunol Inflamm                                         | NA                               | NA                         | NA                                 | NA                                   |
| 18  | Pochat-Cotilloux (2018); Retina                                          | NA                               | NA                         | 16                                 | 15                                   |

|    |                                          |    |    |    |    |
|----|------------------------------------------|----|----|----|----|
| 19 | Cani (2017); Oncotarget                  | NA | NA | NA | NA |
| 20 | Cimino (2016); Indian J Ophthalmol       | NA | NA | NA | NA |
| 21 | Taki (2017); Ocul Immunol Inflamm        | NA | NA | NA | NA |
| 22 | Mahajan (2016); Ocul Immunol Inflamm     | NA | NA | NA | NA |
| 23 | Kase (2016); Diagn Pathol                | NA | NA | 16 | 10 |
| 24 | Raja (2016); Retina                      | NA | NA | NA | NA |
| 25 | Bonzheim (2015); Blood                   | NA | NA | NA | NA |
| 26 | Pulido (2015); Retina                    | NA | NA | NA | NA |
| 27 | Levasseur (2013); JAMA Ophthalmol        | NA | NA | NA | NA |
| 28 | Wang (2011); Int J Mol Sci               | NA | NA | 98 | 53 |
| 29 | Ma (2016); Ann Hematol                   | 14 | 14 | NA | NA |
| 30 | Egawa (2015); BMC Ophthalmol             | NA | NA | 4  | 4  |
| 31 | Wang (2014); Cancer Sci                  | NA | NA | NA | NA |
| 32 | Jang (2013); J Ophthalmic Inflamm Infect | NA | NA | NA | NA |
| 33 | Teckie (2014); Leuk Lymphoma             | NA | NA | NA | NA |

**Table S3.** Calculated sensitivity for all examined methods in the dataset.

| S/N | Study                                                                    | Cytology Sensitivity | MyD88 Sensitivity | PCR IgH Rearrangement Sensitivity | Flow Sensitivity | IL10/IL6 Sensitivity |
|-----|--------------------------------------------------------------------------|----------------------|-------------------|-----------------------------------|------------------|----------------------|
| 1   | Giuffrè (2020); Ocul Immunol and Inflamm                                 | 0.36                 | 0.83              | NA                                | NA               | NA                   |
| 2   | Tsubota (2020); J Clin Med                                               | 0.50                 | NA                | 0.35                              | NA               | 0.80                 |
| 3   | Arai (2020); Cancer Sci                                                  | 1.00                 | 0.67              | NA                                | NA               | 1.00                 |
| 4   | Lee (2020); Haematologica                                                | 0.33                 | 0.78              | 0.56                              | NA               | 1.00                 |
| 5   | Marchese(2019); Br J ophthalmol                                          | 0.72                 | NA                | NA                                | 0.75             | NA                   |
| 6   | Shi (2021); Ocul Immunol Inflamm                                         | NA                   | 0.85              | NA                                | NA               | NA                   |
| 7   | Tan (2019); Blood                                                        | NA                   | 1.00              | NA                                | NA               | NA                   |
| 8   | Quintyn (2019); Cytopathology                                            | 0.50                 | 0.75              | 0.50                              | NA               | 0.80                 |
| 9   | Ito (2019); Graefe's Archive for Clinical and Experimental Ophthalmology | 0.77                 | NA                | NA                                | NA               |                      |
| 10  | Hoog (2019); Acta Ophthalmol                                             | NA                   | NA                | NA                                | 0.60             | 0.90                 |
| 11  | Yonese (2019); Eur J Haematol                                            | 0.76                 | 0.71              | NA                                | 0.53             | 0.94                 |
| 12  | Miserocchi (2019); Retina                                                | 0.75                 | 1.00              | NA                                | NA               | NA                   |
| 13  | Carreno (2018); Acta Ophthalmol                                          | NA                   | 0.73              | 0.14                              | NA               | NA                   |
| 14  | Hiemcke-Jiwa (2018); JAMA Ophthalmol                                     | 0.30                 | 0.75              | NA                                | 0.59             | NA                   |
| 15  | Nakahara (2018); BMC Ophthalmol                                          | NA                   | NA                | 0.80                              | 0                | NA                   |
| 16  | Lee (2019); Retina                                                       | 0.32                 | NA                | 0.86                              | NA               | 0.82                 |
| 17  | Cho (2018); Ocul Immunol Inflamm                                         | 0.11                 | NA                | NA                                | NA               | NA                   |
| 18  | Pochat-Cotilloux (2018); Retina                                          | 0.94                 | NA                | NA                                | NA               | 0.94                 |
| 19  | Cani (2017); Oncotarget                                                  | 0.50                 | 0.50              | NA                                | NA               | NA                   |
| 20  | Cimino (2016); Indian J Ophthalmol                                       | 1.00                 | NA                | 1.00                              | NA               | NA                   |
| 21  | Taki (2017); Ocul Immunol Inflamm                                        | 1.00                 | NA                | NA                                | NA               | NA                   |
| 22  | Mahajan (2016); Ocul Immunol                                             | 1.00                 | NA                | NA                                | NA               | NA                   |

| Inflamm |                                          |      |      |      |      |      |
|---------|------------------------------------------|------|------|------|------|------|
| 23      | Kase (2016); Diagn Pathol                | 0.93 | NA   | NA   | NA   | 0.67 |
| 24      | Raja (2016); Retina                      | NA   | 0.61 | NA   | NA   | NA   |
| 25      | Bonzheim (2015); Blood                   | 0.50 | 0.62 | 0.65 | NA   | NA   |
| 26      | Pulido (2015); Retina                    | NA   | 0.67 | NA   | NA   | NA   |
| 27      | Levasseur (2013); JAMA Ophthalmol        | 0.87 | NA   | 0.45 | NA   | NA   |
| 28      | Wang (2011); Int J Mol Sci               | 0.54 | NA   | 1.00 | NA   | 0.54 |
| 29      | Ma (2016); Ann Hematol                   | 1.00 | NA   | NA   | 1.00 | NA   |
| 30      | Egawa (2015); BMC Ophthalmol             | 1.00 | NA   | NA   | NA   | 1.00 |
| 31      | Wang (2014); Cancer Sci                  | 0.89 | NA   | 1.00 | NA   | NA   |
| 32      | Jang (2013); J Ophthalmic Inflamm Infect | 1.00 | NA   | NA   | NA   | NA   |
| 33      | Teckie (2014); Leuk Lymphoma             | 0.94 | NA   | NA   | NA   | NA   |
